# Supplementary material for: Luminescent MOF material based on cadmium(ii) and mixed ligands: application for sensing volatile organic solvent molecules
Source: Royal Society of Chemistry journal article supplement (doi:10.1039/c4ra16599c), 2015-01-01
Supplement: c4ra16599c1.pdf [file c4ra16599c1.pdf]

## Supporting Information

### Luminescent MOF Material based on Cadmium(II) and Mixed Ligands: Application for Sensing Volatile Organic Solvent Molecules

Dongmei Wang, Lirong Zhang, Guanghua Li, Qisheng Huo and Yunling Liu\*

*State Key Laboratory of Inorganic Synthesis and Preparative Chemistry, College of Chemistry, Jilin University, Changchun 130012, P. R. China*

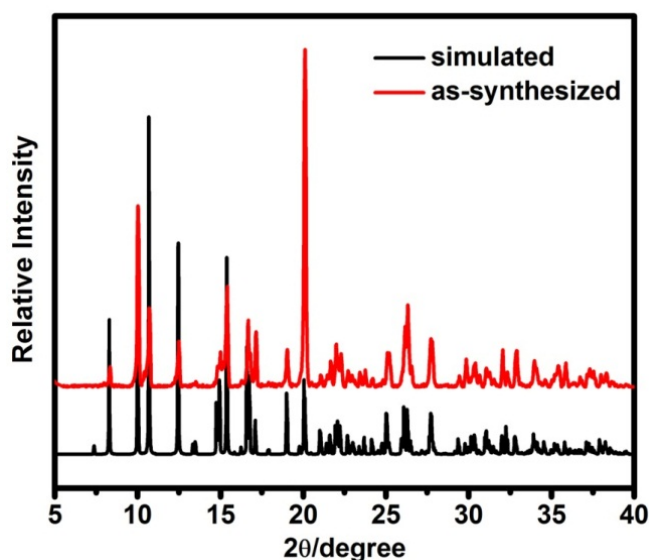

**Fig. S1.** Experimental and calculated power PXRD patterns for compound **1**, indicate the phase purity of the as-synthesized samples.

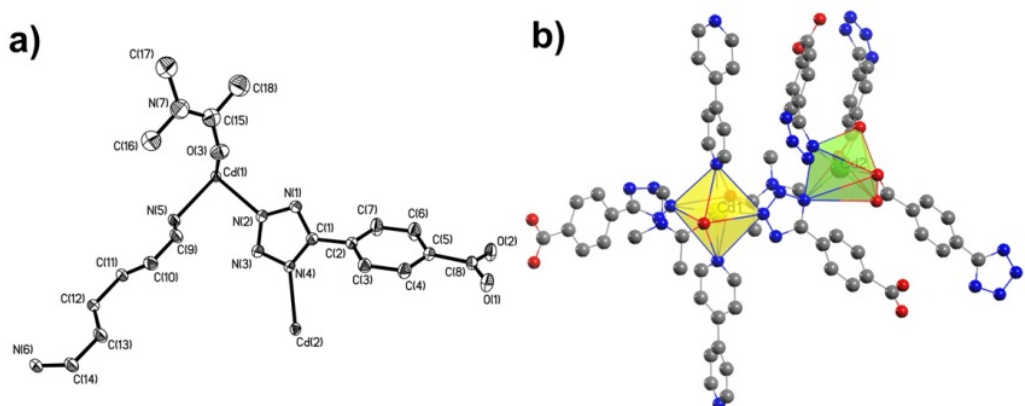

**Fig. S2.** a) The asymmetric unit of compound **1**; b) View of the coordination environment of Cd1 and Cd2 atoms in compound **1** (H atoms are omitted for clarity).

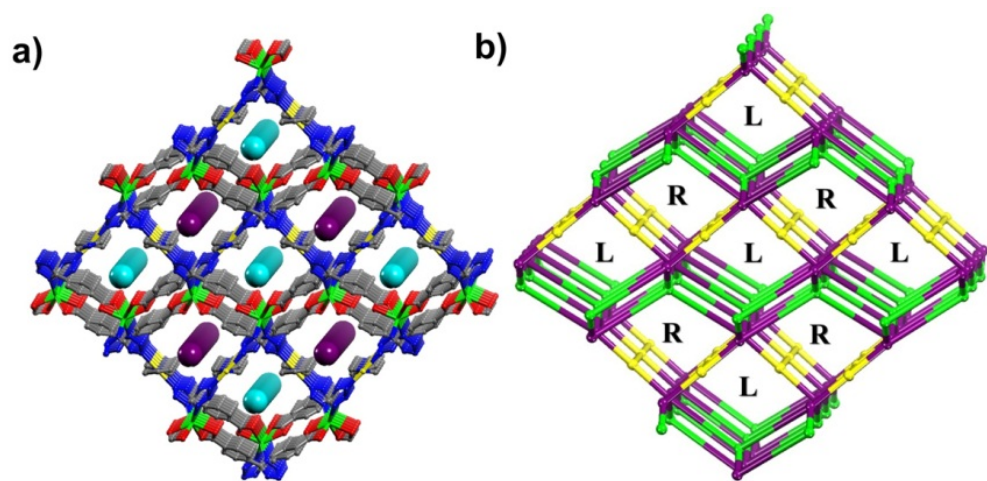

**Fig. S3.** a) and b) View of helical channels with opposite handedness along the [110] direction.

**Table S1** The topological information for compound **1** (3,4,4)-c net calculated by *Topos 4.0* and *Systre*.

| Vertex figure                | triangle + Square + Tetrahedron |     |     |     |     |     |     |     |     |      |       |
|------------------------------|---------------------------------|-----|-----|-----|-----|-----|-----|-----|-----|------|-------|
| Vertex                       | CS1                             | CS2 | CS3 | CS4 | CS5 | CS6 | CS7 | CS8 | CS9 | CS10 | Cum10 |
| V <sub>1</sub> (triangle)    | 3                               | 8   | 15  | 38  | 77  | 142 | 220 | 308 | 408 | 518  | 1737  |
| V <sub>2</sub> (square)      | 4                               | 10  | 24  | 48  | 80  | 130 | 212 | 312 | 396 | 492  | 1708  |
| V <sub>3</sub> (tetrahedron) | 4                               | 6   | 16  | 38  | 82  | 152 | 226 | 304 | 418 | 538  | 1784  |

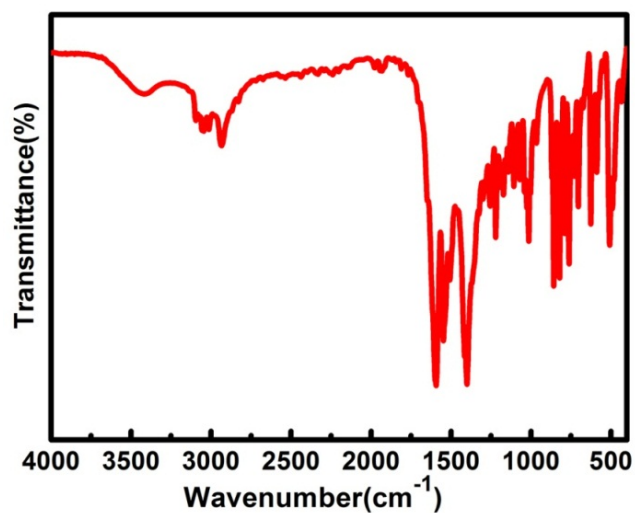

**Fig. S4.** Infrared spectrum for compound **1** (4000-400  $\text{cm}^{-1}$ ).

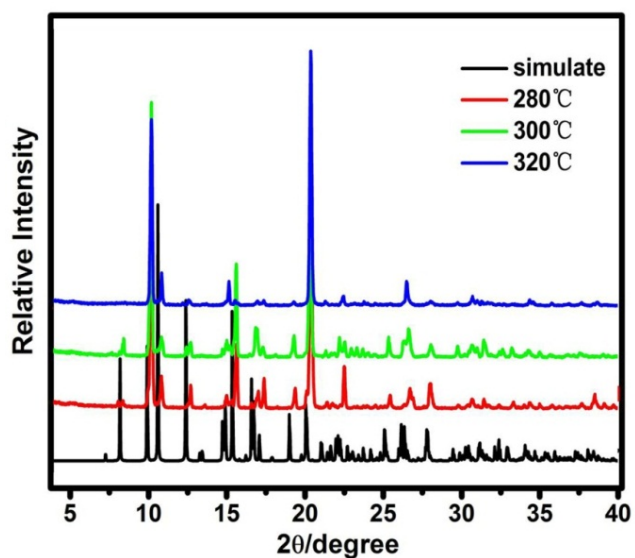

**Fig. S5.** The simulated and temperature-dependent powder XRD of compound **1**.

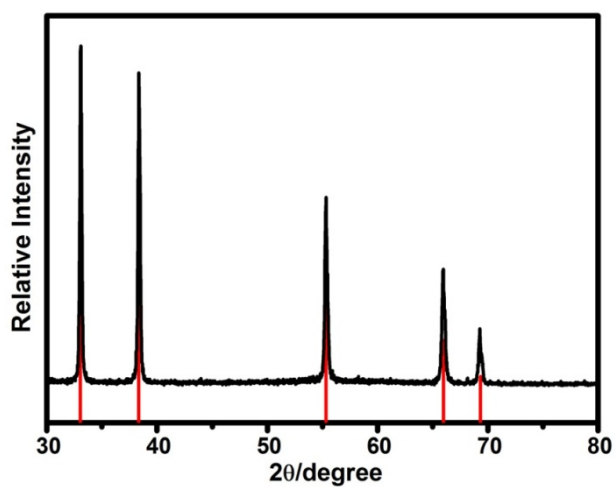

**Fig. S6.** Powder XRD studies indicate that compound **1** upon calcinations above 600  $^{\circ}\text{C}$  is a main phase of CdO (JCPDS: 05-0640).

**Table S2** Selected bond lengths [ $\text{\AA}$ ] and angles [ $^\circ$ ] for compound **1**.

| compound <b>1</b>   |            |                     |            |
|---------------------|------------|---------------------|------------|
| Cd(1)-N(2)          | 2.325(3)   | Cd(2)-N(4)          | 2.298(3)   |
| Cd(1)-N(2)#1        | 2.325(3)   | Cd(2)-N(4)#3        | 2.298(3)   |
| Cd(1)-O(3)#1        | 2.332(3)   | Cd(2)-O(1)#4        | 2.349(3)   |
| Cd(1)-O(3)          | 2.332(3)   | Cd(2)-O(1)#5        | 2.349(3)   |
| Cd(1)-N(5)          | 2.388(4)   | Cd(2)-O(2)#4        | 2.368(3)   |
| Cd(1)-N(6)#2        | 2.412(4)   | Cd(2)-O(2)#5        | 2.368(3)   |
| N(2)-Cd(1)-N(2)#1   | 174.19(17) | N(4)-Cd(2)-N(4)#3   | 85.87(18)  |
| N(2)-Cd(1)-O(3)#1   | 92.46(12)  | N(4)-Cd(2)-O(1)#4   | 96.40(12)  |
| N(2)#1-Cd(1)-O(3)#1 | 87.22(12)  | N(4)#3-Cd(2)-O(1)#4 | 144.19(11) |
| N(2)-Cd(1)-O(3)     | 87.22(12)  | N(4)-Cd(2)-O(1)#5   | 144.19(11) |
| N(2)#1-Cd(1)-O(3)   | 92.46(12)  | N(4)#3-Cd(2)-O(1)#5 | 96.40(12)  |
| O(3)#1-Cd(1)-O(3)   | 173.81(17) | O(1)#4-Cd(2)-O(1)#5 | 101.91(17) |
| N(2)-Cd(1)-N(5)     | 87.09(8)   | N(4)-Cd(2)-O(2)#4   | 122.09(11) |
| N(2)#1-Cd(1)-N(5)   | 87.09(8)   | N(4)#3-Cd(2)-O(2)#4 | 93.07(11)  |
| O(3)#1-Cd(1)-N(5)   | 86.91(8)   | O(1)#4-Cd(2)-O(2)#4 | 55.59(11)  |
| O(3)-Cd(1)-N(5)     | 86.91(8)   | O(1)#5-Cd(2)-O(2)#4 | 93.56(11)  |
| N(2)-Cd(1)-N(6)#2   | 92.91(8)   | N(4)-Cd(2)-O(2)#5   | 93.07(11)  |
| N(2)#1-Cd(1)-N(6)#2 | 92.91(8)   | N(4)#3-Cd(2)-O(2)#5 | 122.09(11) |
| O(3)#1-Cd(1)-N(6)#2 | 93.09(8)   | O(1)#4-Cd(2)-O(2)#5 | 93.56(11)  |
| O(3)-Cd(1)-N(6)#2   | 93.09(8)   | O(1)#5-Cd(2)-O(2)#5 | 55.59(10)  |
| N(5)-Cd(1)-N(6)#2   | 180.0      | O(2)#4-Cd(2)-O(2)#5 | 132.93(16) |

Symmetry transformations used to generate equivalent atoms:

#1  $-x+1/2, -y, z$     #2  $x, y, z-1$     #3  $x, -y+1/2, -z+1/2$   
#4  $-x+1, -y+1, -z$     #5  $-x+1, y-1/2, z+1/2$     #6  $x, y, z+1$
